# Supplementary material for: Laser scribed proton exchange membranes for enhanced fuel cell performance and stability
Source: PubMed Central journal article supplement (PMC11685907; doi:10.1038/s41467-024-55070-8), 2024-12-30
Supplement: 41467_2024_55070_MOESM3_ESM.pdf [file 41467_2024_55070_MOESM3_ESM.pdf]

## **Description of Additional Supplementary Files**

**Supplementary Movie 1:** Visualisation simulation of gas distribution potential, current density and water distribution of LPAa at different voltage
